# Supplementary material
Source: publisher site journal article supplement (https://www.degruyter.com/publication/journal_key/JISYS/downloadAsset/JISYS_CFP%20New%20Paradigms%20in%20Intelligent%20Neural%20Networks%20for%20the%20Management%20of%20Transport%20and%20Logistics.pdf)
Supplement: Supplementary file 1 [file JISYS_CFP%20New%20Paradigms%20in%20Intelligent%20Neural%20Networks%20for%20the%20Management%20of%20Transport%20and%20Logistics.pdf]



*Special Issue:*

# New Paradigms in Intelligent Neural Networks for the Management of Transport and Logistics

## GUEST EDITORS

---

**Dr. Adeleh Asemi Zavareh**, Universiti Malaya, Kuala Lumpur, Malaysia [adeleh@um.edu.my](mailto:adeleh@um.edu.my)

**Dr. Ali Alibeigi**, Universiti Malaya, Malaysia [alibeigi@siswa.um.edu.my](mailto:alibeigi@siswa.um.edu.my)

**Dr. Ali Akbari**, University of Isfahan, Iran [a.akbari@edu.ui.ac.ir](mailto:a.akbari@edu.ui.ac.ir)

**Dr. Mutaz AlShafeey**, Corvinus University of Budapest, Budapest, Hungary [mutaz.alshafeey@uni-corvinus.hu](mailto:mutaz.alshafeey@uni-corvinus.hu)

## DESCRIPTION

---

Intelligent neural networks comprise computational approximations for biological neural networks that enable the adult brain's vision, perception, and decision-making functioning. Intelligent neural networks may learn through experience from a vast amount of information with hardly any intervention. Intelligent Neural Networks serve as just a venue for the development and maintenance of a worldwide ecosystem of research groups and professionals concerned throughout various areas of intelligent neural networks, encompassing deep neural learning and methodological applications towards machine learning and artificial intelligence. Moreover, Intelligent Neural Networks embrace contributions that advance the field of neural network investigation across the board, from models that can be implemented and algorithmic neuroscience to convolutional neural networks and applied mathematics to technology and engineering implementations of processes that heavily rely on artificial neural network concepts and approaches. This unmatched diversity allows idea exchange among fundamental biological disciplines and contributes to the growth of a multidisciplinary society concerned with bio-inspired artificial intelligence.

Releasing intelligence among consumers and sellers is crucial for long-term economic superiority in today's complicated supply chain management. Expense information is critical to buying scenarios, including various company stakeholders. Thus according to academic research published in the study, convolutional neural networks are believed to have a significant potential for computer vision to expose operational costs. This knowledge will allow savings and operational effectiveness in electronically connected supply chain operations and create clinch scenarios in supply chain collaboration. Nonetheless, the researchers don't conduct a complete examination of how ANNs might aid in cost estimates for buying choices and management of Transport and Logistics. Users analyze ANNs' capacity to acquire price structure information using a specific example from the automobile sector. Additionally, researchers compare ANNs for a price estimate in buying to specific other potential machine learning methods in a comparative evaluation.

Deep learning can revolutionize the internet security industry, as neural network-powered algorithms may self-optimize through time, knowing to forecast, detect, and eliminate new dangers in advance of their occurrence to handle transportation and logistics. Business is a broad discipline with several subspecialties, including financial and accounting modeling. Practically every artificial neural network program may be used to handle a single company sector or financial statement analysis and transportation and logistics. Intelligent neural networks have the opportunity to be used for commercial reasons, such as the allocation of resources and planning. Additionally, there's a significant opportunity for employing artificial neural networks towards database mining, which is the process of looking for hidden patterns among expressly recorded information within collections to manage transportation and logistics. Intelligent Neural networks offer a wide range of applications for solving real-world business challenges. Indeed, strategies have been effectively used in a variety of businesses. Because neural networks excel at detecting trends and patterns in information, they are already well towards predicting and forecasting tasks such as demand, industrial operations monitoring, customer acquisition, validation of data, risk mitigation, and product promotion.

Topics:

- Operations models for transportation and Logistics using Intelligent Neural networks
- Advancement in supply-chain management of transportation and Logistics using ANN
- Multi-channel framework operations for supply chains management in transportation and Logistics
- Intelligent Neural networks for digitalization in Process design in Logistics
- Convergence of ANN with Industrial IoT for transportation and Logistics management
- Enhanced Predictive Market analysis for transportation and Logistics management
- Opportunities and challenges in Intelligent Neural networks for green logistics
- Consumer behavior analysis using transportation and Logistics management
- Novel logistics management performance and practices using ANN
- Target marketing assessment and evaluation for transportation and Logistics management

## IMPORTANT DATES

---

**Submission of manuscript:** 30.04.2024

## HOW TO SUBMIT

---

Before submission authors should carefully read the [Instructions for Authors](#) and [Publication Ethics](#)

All submissions to the Special Issue must be made electronically via the online submission system <https://mc.manuscriptcentral.com/jisys>

All manuscripts will undergo the standard peer-review process (single-blind, at least two independent reviewers). When entering your submission via the online submission system please choose the option "SI New Paradigms in INN".

Submission of a manuscript implies that the work described has not been published before and is not under consideration for publication anywhere else.

We are looking forward to your submission!

[degruyter.com/jisys](https://degruyter.com/jisys)

In case of any further questions please contact:  
Editorial Office – [JISYS\\_Editorial@degruyter.com](mailto:JISYS_Editorial@degruyter.com)
